# Supplementary material for: CeFeO3–CeO2–Fe2O3 Systems: Synthesis by Solution Combustion Method and Catalytic Performance in CO2 Hydrogenation
Source: MDPI journal article supplement (doi:10.3390/ma15227970), 2022-11-11
Supplement: s1 [file s1]

## *Supplementary Material*

### **CeFeO<sub>3</sub>–CeO<sub>2</sub>–Fe<sub>2</sub>O<sub>3</sub> systems: synthesis by solution combustion method and catalytic performance in CO<sub>2</sub> hydrogenation**

*Anna N. Matveyeva<sup>a</sup>, Shamil O. Omarov<sup>a</sup>, Marianna A. Gavrilova<sup>a</sup>, Dmitry A. Dmitry A.*

*Sladkovskiy<sup>b</sup>, and Dmitry Yu. Murzin<sup>\*c</sup>*

<sup>a</sup>Laboratory of Materials and Processes for Hydrogen Energy, Ioffe Institute, Politekhnicheskaya ul. 28, St. Petersburg 194021, Russia

<sup>b</sup>Laboratory of Catalytic Technologies, St. Petersburg State Institute of Technology (Technical University), Moskovskiy pr. 26, St. Petersburg 190013, Russia

<sup>c</sup>Laboratory of Industrial Chemistry and Reaction Engineering, Åbo Akademi University, Henriksgatan 2, Turku/Åbo 20500, Finland

\*e-mail: dmurzin@abo.fi

Chemical equations with fuel to calculate the amount of reagents

#### **Glycine**

Total valency of glycine:  $C_2H_5NO_2 = 4 \cdot 2 + 1 \cdot 5 - 2 \cdot 2 = +9$

Total valency of oxidizers:  $Ce(NO_3)_3 = 3 - 2 \cdot 3 \cdot 3 = -15$ ;  $Fe(NO_3)_3 = 3 - 2 \cdot 3 \cdot 3 = -15$

1)  $\varphi=1$ :  $3Ce(NO_3)_3(aq) + 3Fe(NO_3)_3(aq) + 10C_2H_5NO_2 \rightarrow 3CeFeO_3 + 20CO_2 + 14N_2 + (25H_2O)$

2)  $\varphi=1.25$ :  $24Ce(NO_3)_3(aq) + 24Fe(NO_3)_3(aq) + 100C_2H_5NO_2 + 45O_2 \rightarrow 24CeFeO_3 + 200CO_2 + 122N_2 + (250H_2O)$

3)  $\varphi=1.4$ :  $3Ce(NO_3)_3(aq) + 3Fe(NO_3)_3(aq) + 14C_2H_5NO_2 + 9O_2 \rightarrow 3CeFeO_3 + 28CO_2 + 16N_2 + (35H_2O)$

4)  $\varphi=1.5$ :  $4Ce(NO_3)_3(aq) + 4Fe(NO_3)_3(aq) + 20C_2H_5NO_2 + 15O_2 \rightarrow 4CeFeO_3 + 40CO_2 + 22N_2 + (50H_2O)$

#### **Urea**

Total valency of urea:  $(NH_2)_2CO = 1 \cdot 4 + 4 - 2 = +6$

5)  $\varphi=1$ :  $Ce(NO_3)_3(aq) + Fe(NO_3)_3(aq) + 5(NH_2)_2CO \rightarrow CeFeO_3 + 5CO_2 + 8N_2 + (10H_2O)$

6)  $\varphi=1.5$ :  $4Ce(NO_3)_3(aq) + 4Fe(NO_3)_3(aq) + 30(NH_2)_2CO + 15O_2 \rightarrow 4CeFeO_3 + 30CO_2 + 42N_2 + (60H_2O)$

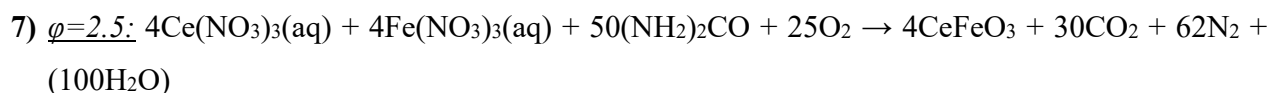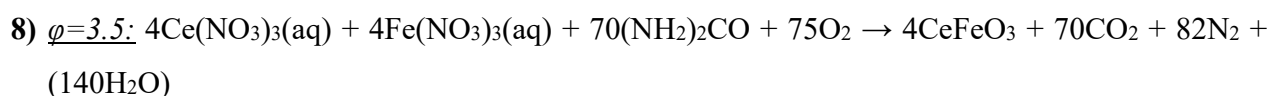

### **Urotropine**

Total valency of urotropine:  $\text{C}_6\text{H}_{12}\text{N}_4 = 4 \cdot 6 + 1 \cdot 12 = +36$

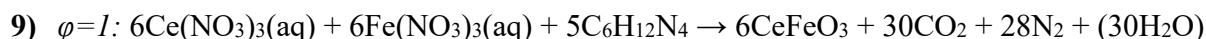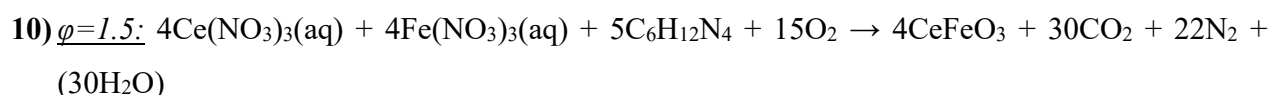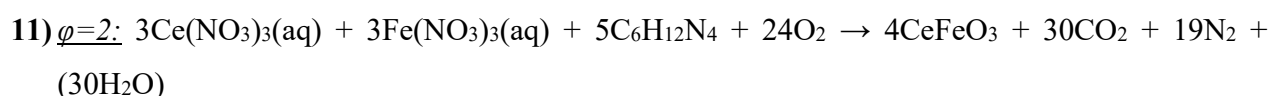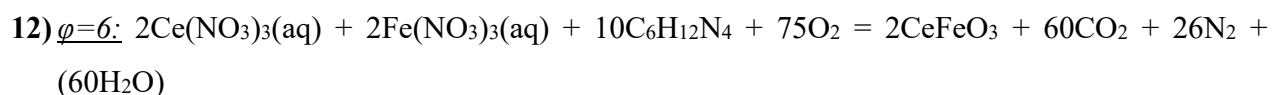

### **Glycine and $\text{NH}_4\text{NO}_3$**

Total valency of oxidizers:  $\text{NH}_4\text{NO}_3 = 1 \cdot 4 - 2 \cdot 3 = -2$

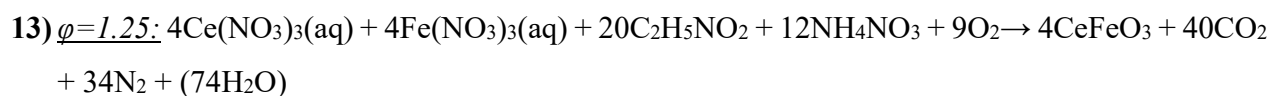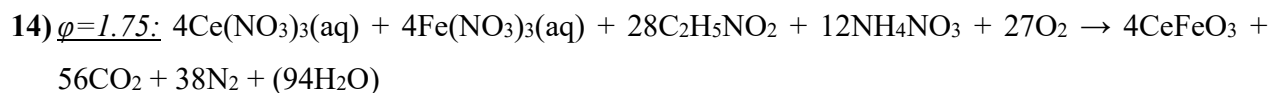

### **Glycine and glucose**

Total valency of glucose:  $\text{C}_6\text{H}_{12}\text{O}_6 = 4 \cdot 6 + 1 \cdot 12 - 2 \cdot 6 = +24$

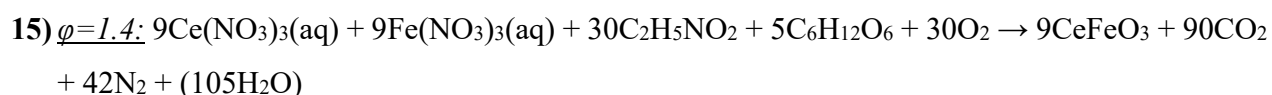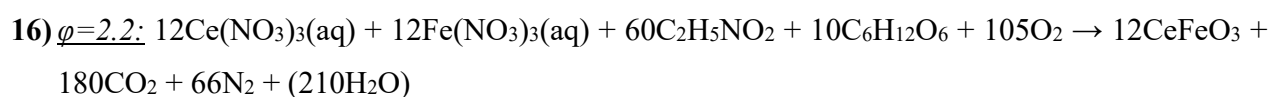

### **Urea and $\text{NH}_4\text{NO}_3$**

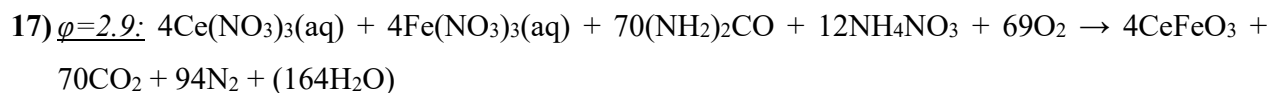

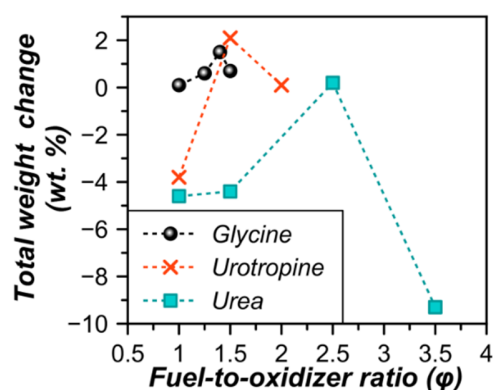

Figure S1. Total weight change during heating in air from 25 to 800 °C for the as-prepared samples produced by SCS using different fuels, additives and fuel-to-oxidizer ratios.

Table S1. Assignment of major absorption IR spectra peaks for the as-prepared samples produced by solution combustion synthesis using different fuels.

| Wavenumber, $\text{cm}^{-1}$                                                                                                              | Assignment                                     | Substance                     |
|-------------------------------------------------------------------------------------------------------------------------------------------|------------------------------------------------|-------------------------------|
| 3727                                                                                                                                      | $\nu(\text{OH})$                               | adsorbed $\text{H}_2\text{O}$ |
| 3343–3453                                                                                                                                 | $\nu_s, \nu_{as}(\text{H}_2\text{O})$          |                               |
| 3212–3430                                                                                                                                 | $\nu_s, \nu_{as}(\text{NH}_3)$                 |                               |
| 2959                                                                                                                                      | $\nu(\text{CH})$                               | unreacted fuel                |
| 2920–2924                                                                                                                                 | $\nu_{as}(\text{CH}_2)$                        |                               |
| 2852–2854                                                                                                                                 | $\nu_s(\text{CH}_2)$                           |                               |
| 2100–2105                                                                                                                                 | $\nu(-\text{C}\equiv\text{C}-)$                |                               |
| 1709                                                                                                                                      | $\nu(\text{C}=\text{O})$                       |                               |
| 1664–1667                                                                                                                                 | $\nu_{as}(\text{COO}), \nu(\text{C}=\text{O})$ |                               |
| 1619–1621                                                                                                                                 | $\beta_{as}(\text{NH}_3)$                      |                               |
| 1446                                                                                                                                      | $\delta(\text{CH}_2)$                          |                               |
| 1383–1385                                                                                                                                 | $\nu_s(\text{NO}_3^-)$                         | unreacted nitrate groups      |
| 1115–1156                                                                                                                                 | $\rho(\text{NH}_3)$                            | unreacted fuel                |
| 548–552, 404–406                                                                                                                          | $\nu(\text{FeO})$                              | $\text{CeFeO}_3$              |
| Symbols for vibrations: $\nu$ , stretching; $\delta$ , deformation; $\beta$ , bending; $\rho$ , rocking; as, antisymmetric; s, symmetric. |                                                |                               |

Table S2. Data on the phase composition, crystallinity and reproducibility of the synthesized materials according to the refinement by the Rietveld method.

| Sample N | Fuel                | n(AN)/<br>n(MeN) | $\phi$ | Phase composition<br>(Rietveld refinement),<br>wt% |                  |                                          | D (1),<br>nm | D (2),<br>nm | D (3),<br>nm | $R_{wp}/R_e$ |
|----------|---------------------|------------------|--------|----------------------------------------------------|------------------|------------------------------------------|--------------|--------------|--------------|--------------|
|          |                     |                  |        | CeFeO <sub>3</sub>                                 | CeO <sub>2</sub> | $\gamma$ -Fe <sub>2</sub> O <sub>3</sub> |              |              |              |              |
| 1        | Glycine             | –                | 1      | 81                                                 | 19               | 0                                        | 67.5         | 4.7          | –            | –            |
| 2        |                     | –                | 1.25   | 78                                                 | 12               | 10                                       | 66.0         | 7.5          | 6.7          | 1.14         |
| 3-1      |                     | –                | 1.4    | 95                                                 | 5                | 0                                        | 61.3         | 25.0         | –            | 1.16         |
| 3-2      |                     |                  |        | 93                                                 | 7                | 0                                        | 64.0         | 14.5         | –            | 1.11         |
| 4        |                     | –                | 1.5    | 87                                                 | 13               | 0                                        | 56.8         | 9.0          | –            | –            |
| 5-1      |                     | 1.5              | 1.25   | 96                                                 | 4                | 0                                        | 69.1         | 15.6         | –            | 1.13         |
| 5-2      |                     |                  |        | 94                                                 | 6                | 0                                        | 72.0         | 18.6         | –            | 1.13         |
| 6        |                     |                  | 1.75   | 33                                                 | 47               | 20                                       | 32.7         | 14.8         | 14.7         | 1.03         |
| 7        | Glycine+<br>glucose | –                | 1.4    | 63                                                 | 23               | 14                                       | 52.0         | 19.4         | 14.3         | –            |
| 8        | Urea                | –                | 2.5    | 52                                                 | 28               | 20                                       | 68.6         | 5.8          | 4.0          | –            |
| 9-1      |                     | –                | 3.5    | 80                                                 | 13               | 7                                        | 72.0         | 4.7          | 6.3          | 1.09         |
| 9-2      |                     |                  |        | 84                                                 | 16               | 0                                        | 60.4         | 4.2          | –            | 1.10         |
| 10-1     |                     | 1.5              | 2.9    | 91                                                 | 9                | 0                                        | 66.5         | 22.0         | –            | 1.17         |
| 10-2     |                     |                  |        | 92                                                 | 8                | 0                                        | 72.0         | 13.1         | –            | 1.11         |
| 11-1     | Urotropine          | –                | 1.5    | 48                                                 | 33               | 19                                       | 75.1         | 22.1         | 15.8         | –            |
| 11-2     |                     |                  |        | 42                                                 | 42               | 16                                       | 74.5         | 12.5         | 25.3         | 1.05         |
| 12       |                     | –                | 2      | 61                                                 | 23               | 16                                       | 60.0         | 16.4         | 7.1          | 1.09         |

Note: AN – ammonium nitrate; MeN – cerium and iron nitrates;  $\phi$  – fuel-to-oxidizer ratio; 1 – CeFeO<sub>3</sub>; 2 – CeO<sub>2</sub>; 3 –  $\gamma$ -Fe<sub>2</sub>O<sub>3</sub>; the ratio of the weighted ( $R_{wp}$ ) and expected ( $R_e$ ) R-factors characterizes goodness of fit, if the squared value is equal to one or constant the refinement procedure is complete.

Table S3. Influence of additions (glucose, NH<sub>4</sub>NO<sub>3</sub>) on glycine(or urea)-nitrate solution combustion process and the obtained SCS products.

| Fuel, addition                                           | Glycine, glucose                                                                    | Glycine, NH <sub>4</sub> NO <sub>3</sub>                                            | Glycine, NH <sub>4</sub> NO <sub>3</sub>                                              | Urea, NH <sub>4</sub> NO                                                              |
|----------------------------------------------------------|-------------------------------------------------------------------------------------|-------------------------------------------------------------------------------------|---------------------------------------------------------------------------------------|---------------------------------------------------------------------------------------|
| $\phi$                                                   | 1.4                                                                                 | 1.25                                                                                | 1.75                                                                                  | 2.9                                                                                   |
| Course of the reaction                                   |  |  |  |  |
| Macromorphology of the obtained materials                |  |  |  |  |
| Total $\Delta m$ during heating up to 800 °C in air, wt% | +0.9                                                                                | +1.2                                                                                | –1.2                                                                                  | –1.0                                                                                  |
| Weight gain, wt%                                         | 1.6                                                                                 | 2.5                                                                                 | 0.5                                                                                   | 2.5                                                                                   |

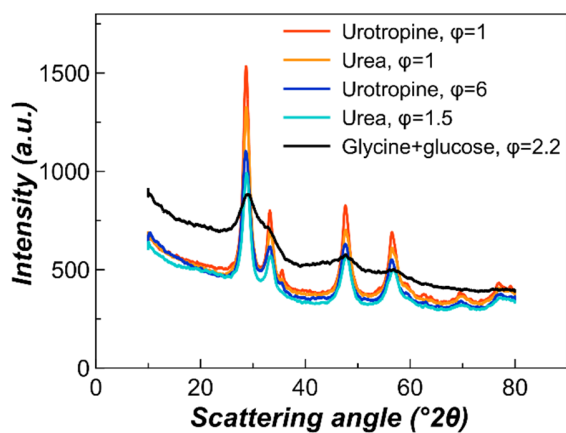

Figure S2. XRD data for Ce-Fe oxide systems obtained by the SCS method using various types of fuel and fuel-to-oxidizer ratios.

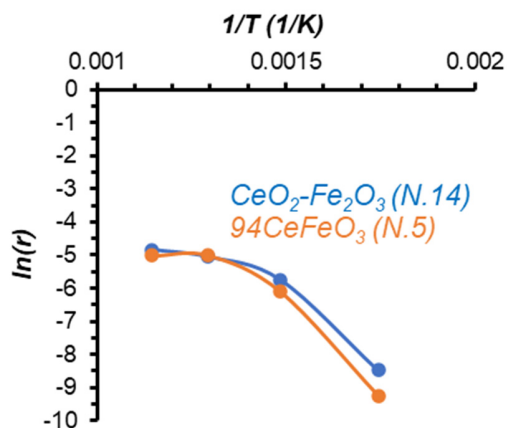

Figure S3. Dependence of the rate for a heterogeneous catalytic reaction on temperature.

### Mass balance

Given:

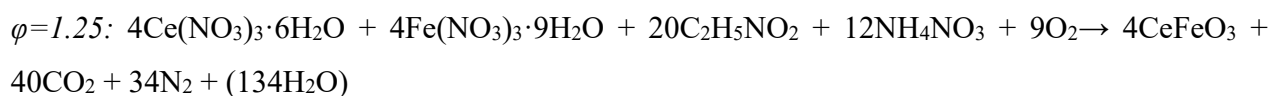

$$m(\text{CeFeO}_3) = 1 \text{ g}$$

---


$$V(\text{CO}_2) = ?$$

Solution:

Table S4. The mass balance of combustion process

| Compound                                             | M, g/mol | Input              |                      | Output             |                      |
|------------------------------------------------------|----------|--------------------|----------------------|--------------------|----------------------|
|                                                      |          | m <sub>1</sub> , g | N <sub>1</sub> , mol | m <sub>2</sub> , g | N <sub>2</sub> , mol |
| Ce(NO <sub>3</sub> ) <sub>3</sub> ·6H <sub>2</sub> O | 434.2    | 1.780              | 0.004                | 0                  | 0                    |

|                                                      |          |              |              |              |              |
|------------------------------------------------------|----------|--------------|--------------|--------------|--------------|
| Fe(NO <sub>3</sub> ) <sub>3</sub> ·9H <sub>2</sub> O | 404.0    | 1.656        | 0.004        | 0            | 0            |
| C <sub>2</sub> H <sub>5</sub> NO <sub>2</sub>        | 75.1     | 1.539        | 0.020        | 0            | 0            |
| NH <sub>4</sub> NO <sub>3</sub>                      | 80.0     | 0.984        | 0.012        | 0            | 0            |
| O <sub>2</sub>                                       | 32.0     | 0.295        | 0.009        | 0            | 0            |
| CeFeO <sub>3</sub>                                   | 244.0    | 0            | 0            | 1.000        | 0.004        |
| CO <sub>2</sub>                                      | 44.0     | 0            | 0            | 1.804        | 0.041        |
| N <sub>2</sub>                                       | 28.0     | 0            | 0            | 0.976        | 0.035        |
| H <sub>2</sub> O                                     | 18.0     | 0            | 0            | 2.474        | 0.137        |
| <b>Sum</b>                                           | <b>-</b> | <b>6.254</b> | <b>0.050</b> | <b>6.254</b> | <b>0.217</b> |

Table S5. Calculation of the volume of released CO<sub>2</sub> and time for its conversion

| <b>m(CeFeO<sub>3</sub>),<br/>g</b> | <b>V(CO<sub>2</sub>),<br/>L</b> | <b>H<sub>2</sub>:CO<sub>2</sub><br/>ratio</b> | <b>WHSV,<br/>mL·<br/>g<sup>-1</sup>·h<sup>-1</sup></b> | <b>Volumetric flow<br/>rate of CO<sub>2</sub> for<br/>hydrogenation,<br/>L/min</b> | <b>Conversion<br/>of CO<sub>2</sub> at<br/>600 °C</b> | <b>Conversion<br/>time, min</b> |
|------------------------------------|---------------------------------|-----------------------------------------------|--------------------------------------------------------|------------------------------------------------------------------------------------|-------------------------------------------------------|---------------------------------|
| 1                                  | 0.92                            | -                                             |                                                        | -                                                                                  | -                                                     | -                               |
| 0.3                                | 0.28                            | 3:1                                           | 10,000                                                 | 0.01                                                                               | 0.41                                                  | 11.5                            |
| 0.1                                | 0.09                            | 1:1                                           | 72,000                                                 | 0.04                                                                               | 0.28*                                                 | 0.63                            |

Note: \*the mean value
